# Supplementary material
Source: publisher figshare collection journal article supplement (https://geolsoc.figshare.com/ndownloader/files/31085965)
Supplement: Supplementary file 1 [file 31085965]

## Sheet: Table S1
Table S1. Reference values of REEs and Fe2O3 in standard materials (GSS-18 and GSS-20).
mg/kg	（GSS-18）	（GSS-20）
	saline-alkali soils	saline-alkali soils
La	30±1	19.4±1.4
Ce	57±2	37±2
Pr	6.9±0.3	4.7±0.2
Nd	26±1	18.7±1.0
Sm	5.0±0.2	4.0±0.1
Eu	1.06±0.05	0.95±0.04
Gd	4.4±0.2	3.7±0.4
Tb	0.74±0.04	0.66±0.04
Dy	4.2±0.2	3.8±0.3
Ho	0.84±0.06	0.80±0.06
Er	2.4±0.2	2.3±0.2
Tm	0.39±0.03	0.38±0.03
Yb	2.5±0.2	2.4±0.3
Lu	0.38±0.03	0.38±0.03
Fe2O3	3.63±0.05	4.12±0.07

## Sheet: Table S2
Table S2. Measurement parameters of ICP-MS.
	ICP-MS, Elan DRC-e
Instrumental settings
RF power (W)	1250
Ion lens settings	Optimized sensitivity and stability
Introduction system	Glass nebulizers and spray chambers
Cooling gas (L/min)	16
Auxiliary gas (L/min)	0.8
Nebulizer gas (L/min)	1.3
Sampler and skimmer cones	Ni cone
Sample uptake rate (µL/min)	0.5
Data acquisition parameters
Integration time (s)	0.03
Blocks	3
Total measurement time (s)	60
Wash-out time (s)	100
NP3 cup configuration
Cup	Amplifier resistance (Ω)
H9	1000000000000
Ax	1000000000000
L6	1000000000000

## Sheet: Table S3
Table S3. Concentrations of REEs and Fe2O3 in laterite profiles from Yunnan province, southwest China.
Sample	Depth (cm)	Fe2O3 (wt.%)	2SD	La	2SD	Ce	2SD	Pr	2SD	Nd	2SD	Sm	2SD	Eu	2SD	Gd	2SD	Tb	2SD	Dy	2SD	Ho	2SD	Er	2SD	Tm	2SD	Yb	2SD	Lu	2SD	∑REE	2SD	LREE	2SD	MREE	2SD	HREE	2SD	δCe	δEu	(La/Yb)N	(La/Gd)N	(Gd/Yb)N
S1-1	0-10	6.44383	0.0253681	26.2989	0.525978	52.7385	0.421908	5.93037	0.960719	27.4055	1.15103	5.34777	0.571973	1.19154	0.0262139	5.00726	0.300435	0.562714	0.0303865	3.60047	2.13868	0.564205	0.00564205	1.70852	0.0102511	0.259485	0.0197208	1.87505	0.228756	0.280363	0.00112145	132.771	6.39282	117.721	3.63161	10.362	2.49572	4.68762	0.265492	0.568112	0.772813	1.03541	0.640708	1.61603
S1-2	10-20	7.0929	0.0526343	25.0639	0.0501278	52.4431	1.36352	6.09912	0.0121982	27.6565	0.165939	5.61046	0.629546	1.2517	0.012517	5.30097	0.0742135	0.603657	0.0362194	3.18615	0.299498	0.594377	0.00713252	1.96108	0.156886	0.271565	0.0315016	2.42673	1.44633	0.290934	0.00989175	132.76	4.29553	116.873	2.22133	10.3425	0.422448	5.54469	1.65175	0.567696	0.790706	0.762451	0.576788	1.32189
S1-3	20-30	7.12056	0.0723015	29.6887	0.178132	60.7939	0.607939	6.97738	0.26514	30.8862	1.7914	6.19665	0.76797	1.40373	0.0758012	6.12629	0.624881	0.69519	0.00834228	3.44926	0.0758837	0.668498	0.0227289	2.14684	0	0.293606	0.00704653	2.24936	0.21144	0.327576	0.00655153	151.903	4.64326	134.543	3.61058	11.6745	0.784908	5.68588	0.247767	0.610042	0.833587	0.974359	0.591176	1.64817
S1-4	30-40	7.07315	0.152958	26.076	1.19949	55.1031	0.881649	6.21206	0.198786	31.0344	2.9793	6.46708	0.836463	1.5135	0.102918	6.63475	0.225582	0.751384	0.0225415	3.76062	0.0150425	0.753975	0.0271431	2.29783	0.427396	0.322022	0.00257617	2.29635	0.0505196	0.346821	0.0208093	143.57	6.99022	124.893	6.09569	12.6603	0.366084	6.01699	0.528444	0.587977	0.870948	0.838279	0.479444	1.74844
S1-5	40-50	7.08946	0.0441978	24.0896	0.192717	50.8562	0.610274	5.64944	0.666634	24.4064	4.34433	5.16319	0.53317	1.14742	0.0550764	4.89747	0.0881544	0.556042	0.0111208	2.81913	0.107127	0.546201	0.0622669	1.78801	0.0894007	0.264377	0.0158626	1.79517	0.0897585	0.280034	0.00392048	124.259	6.86982	110.165	6.34713	9.42006	0.261479	4.6738	0.261209	0.566835	0.754796	0.990627	0.600042	1.65093
S1-6	50-60	7.44308	0.0125639	24.6541	1.7751	56.4606	2.03258	5.60203	0.425754	23.5102	0.376163	5.98068	0.715371	1.40482	0.272536	5.86536	0.0351922	0.683295	0.076529	3.36036	0.0134414	0.774565	0.264901	2.31075	0.0785654	0.309579	0.00309579	2.38228	0.152466	0.350281	0.0385309	133.649	6.26023	116.208	5.32497	11.3138	0.397699	6.12745	0.537559	0.626985	0.851016	0.76398	0.512764	1.48993
S1-7	60-70	6.9085	0.0594327	21.602	0.0864079	44.1964	1.06071	5.08057	0.701119	23.7969	1.57059	5.036	0.507227	1.1643	0.00931438	5.04436	0.353105	0.594882	0.0380725	2.89523	0.0752759	0.602045	0.0650208	1.84274	0.0847661	0.265807	0.00637936	1.84394	0.0626938	0.274959	0.00549918	114.24	4.62619	99.7118	3.92606	9.69877	0.475768	4.82949	0.224359	0.519822	0.764237	0.864836	0.522408	1.65548
S1-8	70-80	7.62606	0.0267571	23.4465	0.140679	46.4222	0.742755	5.50034	0.715045	26.8247	0.643792	5.20811	0.542489	1.18093	0.0448754	4.95191	0.198076	0.595971	0.00953553	3.2926	0.223897	0.580959	0.0232384	1.97956	0.0673052	0.272715	0.0070906	2.01209	0.100604	0.300738	0.00902213	122.569	3.4684	107.402	2.78476	10.0214	0.476384	5.14606	0.207261	0.524421	0.772989	0.860235	0.577601	1.48932
S1-9	80-90	7.63337	0.096862	23.6117	0.283341	47.0067	1.97428	5.8665	0.246393	26.6203	2.28934	5.55713	0.617633	1.26551	0.0379654	5.25896	0.410199	0.637054	0.0522384	3.28204	0.17723	0.622108	0.0211517	2.01391	0.0563895	0.283218	0.00962941	1.91975	0.0767902	0.297043	0.00356451	124.242	6.25615	108.662	5.41099	10.4436	0.677633	5.13604	0.167525	0.521459	0.80292	0.907962	0.547709	1.65774
S1-10	90-100	6.62999	0.0520925	27.3361	0.164017	51.5759	0.618911	6.32048	0.897508	29.331	0.762605	5.80293	0.67348	1.24783	0.022461	5.52633	0.033158	0.648606	0.0661578	3.27422	0.327422	0.660116	0.0448879	2.01042	0.104542	0.294045	0.00823325	2.14111	0.0899265	0.320776	0.0141141	136.49	3.82742	120.366	3.11652	10.697	0.449199	5.42646	0.261704	0.541568	0.773457	0.942507	0.603424	1.56193
S1-11	100-110	6.53605	0.113136	22.2801	0.267361	42.9527	0.343621	5.92036	0.307859	25.706	0.514119	5.5238	0.610247	1.26855	0.00761131	5.3824	0.322944	0.741915	0.353152	3.18203	0.254562	0.613655	0.0208643	1.92934	0.0926084	0.294591	0.0135512	2.00095	0.100047	0.298669	0.0131415	118.095	3.22169	102.383	2.04321	10.5749	0.938269	5.13721	0.240213	0.48192	0.801005	0.821991	0.504968	1.62781
S1-12	110-120	7.08848	0.0148695	26.8718	1.28984	52.1789	1.46101	6.88943	0.261798	31.4292	1.82289	6.30155	0.79419	1.67762	0.892495	5.65631	0.124439	0.723815	0.0361907	3.47798	0.153031	0.65671	0.0144476	2.07853	0.0831412	0.295376	0.00236301	2.18865	0.140074	0.316597	0.0272274	140.742	7.10314	123.671	5.62973	11.5357	1.20616	5.53586	0.267253	0.538161	1.01347	0.90637	0.579543	1.56394
S1-13	120-130	6.45505	0.060791	24.1685	0	48.5233	0.87342	6.1365	0.282279	25.8777	0.103511	5.34655	0.571711	1.18942	0.0618497	5.28999	0.0740599	0.579897	0.00115979	3.07947	0.529669	0.576756	0.0230702	1.81106	0.0724423	0.267058	0.0336493	1.97084	0.0157667	0.276484	0.0049767	125.094	2.64756	110.053	1.83092	10.1388	0.666738	4.9022	0.149905	0.52905	0.760244	0.905282	0.557337	1.6243
S1-14	130-140	5.77063	0.0897664	28.8675	0.288675	55.581	1.11162	6.83067	0.819681	30.1714	2.35337	5.75344	0.662042	1.24501	0.112051	5.67384	0.260996	0.609657	0.0451146	4.01013	2.06121	0.614191	0.0896719	1.89397	0.053031	0.281651	0.0174624	2.03454	0.00406908	0.306844	0.000613687	143.874	7.87961	127.204	5.23539	11.5386	2.47937	5.13119	0.164848	0.56464	0.767805	1.04744	0.620661	1.68762
S1-15	140-150	6.28702	0.0519641	24.0815	0.240815	47.2199	0.472199	5.37054	0	25.5876	1.63761	5.2509	0.55144	1.19298	0.0858947	5.31836	0.202098	0.587158	0.018789	3.08427	0.185056	0.578248	0.0173475	1.87517	0.172516	0.26473	0.00847136	2.59936	1.49723	0.282548	0.0158227	123.293	5.10529	107.511	2.90206	10.1828	0.491838	5.60006	1.71139	0.533019	0.764555	0.683917	0.552369	1.23815
S1-16	150-160	6.18442	0.0835318	26.7385	1.3904	50.9882	1.22372	5.87332	0.481612	26.6061	3.83128	5.08145	0.516423	1.13933	0.0159506	4.98647	0.149594	0.568434	0	3.05773	0.183464	0.58812	0.058812	1.7742	0.0461292	0.286924	0.00631232	1.85885	0.0446124	0.280526	0.0117821	129.828	7.9601	115.288	7.44344	9.75196	0.349008	4.78862	0.167648	0.548242	0.748644	1.06189	0.654135	1.62335
S1-17	160-170	6.55542	0.00160773	23.0002	1.05801	46.2498	0	5.63368	0.416893	24.7389	0.841124	4.91702	0.483542	1.07543	0.0473191	4.62877	0.342529	0.548735	0.0351191	2.65905	0.0797716	0.530665	0.0689864	1.80444	0.209315	0.265773	0.0510284	2.33642	1.53737	0.271944	0.0266505	118.661	5.19765	104.54	2.79957	8.91199	0.504739	5.20924	1.89335	0.521754	0.726386	0.726717	0.606161	1.19888
S1-18	170-180	5.94842	0.0214077	26.559	0.690533	51.0936	1.12406	6.30006	0.100801	25.7577	0.463639	5.08607	0.517362	1.08981	0.0697477	4.90573	0.255098	0.532348	0.0180998	2.83752	0.181601	0.607681	0.00486144	1.93262	0.197127	0.265718	0.020726	1.91846	0.0844124	0.294024	0.00529244	129.18	3.73336	114.796	2.89639	9.3654	0.524547	5.0185	0.312419	0.5408	0.719097	1.02198	0.660435	1.54744
S1-19	180-190	5.85874	0.0620616	27.0764	0.866446	51.1029	0.919853	5.76865	0.772999	25.124	1.00496	4.63248	0.429198	1.02651	0.0841737	4.51009	0.162363	0.513254	0.0513254	2.62315	0.0996796	0.520535	0.0104107	1.72677	0.113967	0.241612	0.0169128	1.84963	0.0702858	0.279378	0.0301728	126.995	4.63275	113.704	3.99346	8.673	0.397542	4.61792	0.241749	0.550081	0.707946	1.08067	0.732368	1.47558
S1-20	190-200	5.95643	0.027196	26.691	1.44132	53.4996	0.534996	6.21223	0.22364	26.1009	1.04404	4.91986	0.4841	1.04232	0.00208464	4.82609	0.173739	0.520951	0.0343828	2.77438	0.294084	0.53387	0.00747419	1.66704	0.0500113	0.259642	0.0379077	1.78874	0.0214648	0.269227	0.0188459	131.106	4.36808	117.424	3.72809	9.16373	0.50429	4.51852	0.135704	0.567576	0.696127	1.10155	0.674672	1.63272
S1-21	200-210	4.9427	0.0347423	26.1261	1.82882	51.3921	2.67239	6.30007	0.113401	25.464	1.78248	4.65435	0.433259	0.992501	0.03176	4.37287	0.12244	0.457564	0.0274538	2.47058	0.301411	0.48291	0.0202822	1.62393	0.0714529	0.22767	0.0122942	1.75778	0.25312	0.258797	0.00517594	126.581	7.67574	113.937	6.83035	8.29352	0.483065	4.35108	0.362325	0.546162	0.689386	1.09723	0.728836	1.50545
S1-22	210-220	5.68983	0.0384634	25.3111	0.911198	50.5477	2.02191	5.72969	0.653184	26.1954	3.14345	4.71466	0.44456	1.03673	0.0850117	4.44673	0.355738	0.507071	0.0243394	2.56636	0.128318	0.496	0.00496	1.61333	0.0677598	0.249329	0.0124664	1.77054	0.0531163	0.259514	0.00467126	125.444	7.91068	112.499	7.1743	8.55689	0.593407	4.38871	0.142974	0.554507	0.714754	1.05533	0.694372	1.51984
S1-23	220-230	6.46623	0.0207552	29.2004	0.700809	58.0281	0.812394	6.36708	0.318354	30.3313	0.363976	5.59091	0.625167	1.20711	0.0193137	5.36592	0.0643911	0.584507	0.0151972	2.99575	0	0.567841	0.0295277	1.82912	0.0621899	0.268445	0.0107378	1.93506	0.0387013	0.297015	0.00356419	144.569	3.06432	129.518	2.8207	10.1533	0.098902	4.89748	0.144721	0.598125	0.760695	1.11398	0.663845	1.67808
S1-24	230-240	6.35355	0.0233932	30.063	0.30063	63.0678	2.39658	6.71049	0.013421	31.3963	3.76756	6.1561	0.757952	1.36068	0.0707554	6.16694	0.493355	0.700472	0.0476321	3.43422	0.137369	0.65608	0.00918512	2.03638	0.146619	0.300424	0.03545	2.06786	0.136479	0.304037	0.0133776	154.421	8.32636	137.394	7.23614	11.6623	0.749112	5.36478	0.341111	0.637024	0.80779	1.07324	0.594682	1.80473
S1-BEDROCK	>240	1.55279	0.00700732	2.64795	0.0423673	4.95563	0.00991125	0.520789	0.00312473	2.10229	0.0294321	0.568307	0.00645946	0.128204	0.0107691	0.619015	0.126279	0.0822802	0.00329121	0.600518	0.226996	0.100777	0.0165275	0.336775	0.0013471	0.0424157	0.00262978	0.387801	0.156672	0.0519832	0.00582212	13.7805	0.641628	10.8798	0.0912948	1.57036	0.367335	1.09693	0.182998	0.463088	0.639199	0.984293	0.813264	1.2103
Sample	Depth (cm)	Fe2O3 (wt.%)	2SD	La	2SD	Ce	2SD	Pr	2SD	Nd	2SD	Sm	2SD	Eu	2SD	Gd	2SD	Tb	2SD	Dy	2SD	Ho	2SD	Er	2SD	Tm	2SD	Yb	2SD	Lu	2SD	∑REE	2SD	LREE	2SD	MREE	2SD	HREE	2SD	δCe	δEu	(La/Yb)N	(La/Gd)N	(Gd/Yb)N
S2-1	0-10	2.93626	0.00405761	29.3491	3.1697	51.8165	4.55985	5.74456	0.0229782	20.5002	1.39401	3.89873	0.304002	0.52447	0.0430066	3.79901	0.387499	0.35686	0.0378272	1.54328	0.274704	0.238897	0.0129004	0.646252	0.00517002	0.0801981	0.0158792	0.708204	0.100565	0.0628006	0.000125601	119.269	10.3282	111.309	9.45054	6.22363	0.743038	1.73635	0.13464	0.546491	0.394187	3.0593	0.942425	3.2462
S2-2	10-20	3.40025	0.0665979	40.059	0	72.3365	0.578692	8.07497	0.839797	28.1522	0.337827	5.30329	0.562497	0.691415	0.0691415	5.28565	0.190283	0.501674	0.0311038	2.27431	0.459411	0.336027	0.037635	0.928914	0.130048	0.106272	0.00233799	0.747348	0.0478303	0.0963764	0.0144565	164.894	3.30106	153.926	2.31881	8.75305	0.74994	2.21494	0.232308	0.648585	0.442855	3.95698	0.924539	4.27995
S2-3	20-30	3.62063	0.00447197	39.7676	3.18141	75.895	2.27685	8.03315	0.112464	29.6066	2.07246	5.50937	0.607063	0.693603	0.0180337	5.25022	0.115505	0.494086	0.0069172	2.08171	0.116575	0.338507	0.0162483	0.888637	0.0106636	0.101328	0.00263452	0.692258	0.0872245	0.0946026	0.00567615	169.447	8.62972	158.812	8.25025	8.51961	0.257031	2.11533	0.122447	0.682645	0.441151	4.2408	0.924006	4.58958
S2-4	30-40	2.82848	0.0246569	40.7036	0.407036	74.2207	1.33597	7.82132	0.0469279	28.3565	1.13426	5.38107	0.579119	0.69388	0.00416328	5.26478	0.336946	0.474125	0.0256028	1.99607	0.251505	0.319325	0.0351257	0.869684	0.0713141	0.101126	0.00222477	0.652263	0.106971	0.086735	0.0112756	166.941	4.34844	156.483	3.50331	8.42885	0.618217	2.02913	0.226911	0.667497	0.443424	4.60677	0.943139	4.8845
S2-5	40-50	2.57824	0.0171925	37.8527	4.0881	69.9092	0.83891	7.52497	0.0300999	27.5041	1.3202	5.31842	0.565711	0.524315	0.00419452	5.03693	0.0503693	0.46348	0.00278088	1.84206	0.0147365	0.29541	0.0183154	0.764561	0.0428154	0.0793948	0.00206426	0.508333	0.00609999	0.0634127	0.00279016	157.687	6.98718	148.109	6.84301	7.86678	0.0720812	1.71111	0.0720853	0.646911	0.339972	5.49712	0.916757	5.99627
S2-6	50-60	3.30387	0.0546323	43.6415	3.84045	81.9293	1.63859	8.6143	0.086143	30.9569	1.60976	5.9203	0.700998	0.661745	0.0238228	5.79085	0.486431	0.53462	0.00855393	2.3074	0.0876812	0.343063	0.0452843	1.06111	0.169778	0.115515	0.0261064	0.971721	0.202118	0.103906	0.00872807	182.952	8.93444	171.062	7.87594	9.29462	0.606489	2.59532	0.452015	0.707231	0.403198	3.31546	0.919348	3.60632
S2-7	60-70	4.02505	0.0131544	43.2438	2.68111	81.7197	2.94191	9.10739	0.965384	34.3495	6.38901	5.83299	0.680477	0.706755	0.0254432	5.68521	0.0341113	0.510211	0.0214289	2.14138	0.188441	0.339303	0.00475024	1.06265	0.155146	0.114609	0.01467	0.797739	0.21539	0.0985235	0.0187195	185.71	14.336	174.253	13.6579	9.04355	0.269425	2.41282	0.408676	0.697976	0.434248	4.00174	0.927897	4.3127
S2-8	70-80	4.42892	0.0281249	40.6006	0.406006	74.1245	0.444747	7.66409	0.0613127	27.4124	1.37062	5.31008	0.563939	0.683839	0.0177798	4.99799	0.389843	0.494	0.021736	2.10075	0.042015	0.355897	0.020642	0.90956	0.130977	0.114321	0.00434419	0.809842	0.0696464	0.107645	0.00172232	165.686	3.54533	155.112	2.84662	8.27658	0.471374	2.29726	0.227332	0.670162	0.444485	3.70099	0.990968	3.73472
S2-9	80-90	5.23015	0.031867	33.0588	1.78518	61.9218	0.371531	6.39808	0.191942	24.0069	5.32953	4.30346	0.370396	0.571979	0.0514781	4.38781	0.570415	0.405481	0.0340604	1.80995	0.0615383	0.299608	0.058124	0.816234	0.0195896	0.105873	0.00169397	0.657644	0.086809	0.0909368	0.00363747	138.835	8.93592	129.689	8.04857	7.17522	0.717492	1.9703	0.169854	0.616925	0.404178	3.71092	0.919099	4.03757
S2-10	90-100	5.70164	0.013256	35.8441	0.716883	64.4778	0.128956	6.61846	0.0794215	24.4068	0.390509	4.53529	0.411377	0.622255	0.0398243	4.4018	0.140858	0.455187	0.0254905	1.89869	0.163287	0.325015	0.0149507	0.955562	0.227424	0.121466	0.0310953	0.75906	0.0470617	0.0978363	0.00665287	145.519	2.42379	135.883	1.72715	7.37793	0.36946	2.25894	0.327184	0.623488	0.434081	3.486	0.993368	3.50928
S2-11	100-110	6.32484	0.0372029	32.8222	3.28222	60.3645	2.41458	6.31005	0.0504804	23.7757	3.61391	4.20767	0.35409	0.61502	0.0393613	4.2603	0.195974	0.401566	0.0554161	1.85237	0	0.31482	0.0692604	0.83822	0.0217937	0.105265	0.0042106	0.788025	0.226951	0.0999042	0.000599425	136.756	10.3288	127.48	9.71528	7.12926	0.290751	2.14623	0.322815	0.60449	0.440352	3.07477	0.93983	3.27163
S2-12	110-120	6.65107	0.0238826	35.1097	3.23009	63.8861	1.14995	7.1038	1.03715	24.748	0.296977	4.5953	0.422335	0.639786	0.0115162	4.36378	0.192006	0.424285	0.00254571	1.82892	0.0402362	0.290953	0.00349143	0.878543	0.00351417	0.105942	0.00783971	0.732292	0.0219688	0.102841	0.00946139	144.81	6.42909	135.443	6.13651	7.25677	0.246304	2.11057	0.0462755	0.611328	0.445975	3.53939	0.981493	3.60613
S2-13	120-130	6.29658	0.0379703	34.2369	0.753212	64.8005	2.20322	6.79095	0.190147	24.2806	1.16547	4.57371	0.418377	0.614653	0.00737583	4.70516	0.0188207	0.442898	0.0602341	1.85495	0.107587	0.300914	0.00120366	0.86885	0.0260655	0.101221	0.00263174	0.72824	0.174778	0.0975567	0.00390227	144.397	5.13302	134.683	4.73042	7.61767	0.194018	2.09678	0.208581	0.630834	0.420274	3.47061	0.887651	3.90988
S2-14	130-140	6.42462	0.0990106	40.1282	4.41411	73.1799	1.4636	7.5543	0.10576	26.9647	0.107859	5.13055	0.526452	0.660315	0.060749	5.27718	0.0633262	0.477272	0.0152727	2.04843	0.102422	0.356862	0.0164156	0.98319	0.108151	0.119439	0.0243656	0.787523	0.0189006	0.109729	0.0114118	163.778	7.03879	152.958	6.61778	8.4632	0.24177	2.35674	0.179245	0.665912	0.426309	3.7616	0.927621	4.0551
S2-15	140-150	7.50204	0.066822	37.8164	2.79841	67.4438	6.60949	7.38646	0.118183	27.3207	2.2403	4.99035	0.498073	0.687514	0.0192504	4.9684	0.228546	0.477338	0.0181389	2.20423	0.0308592	0.334085	0.0220496	1.07022	0.0556515	0.119204	0.00953631	0.834427	0.385505	0.101951	0.0220213	155.755	13.056	144.958	12.2645	8.33747	0.296795	2.45989	0.494764	0.626934	0.454086	3.34563	0.928509	3.60322
S2-16	150-160	6.16223	0.0247658	38.8162	3.57109	71.9067	2.01339	7.53863	0.0150773	29.3204	4.86719	5.10373	0.52096	0.664239	0.0119563	4.94668	0.17808	0.467814	0.00935628	2.10706	0.147494	0.37482	0.0674677	0.947489	0.00947489	0.109125	0.004365	0.697925	0.0181461	0.107227	0.0105083	163.108	11.4446	152.686	10.9877	8.18579	0.346887	2.23659	0.109962	0.660616	0.436965	4.10573	0.957242	4.28912
S2-17	160-170	7.0348	0.161946	44.8958	3.95083	82.3117	0.823117	8.72721	0.0698177	30.7768	1.23107	6.07211	0.737411	0.632103	0.0265483	5.87673	0.141041	0.572773	0.025202	2.50655	0.0150393	0.400138	0.023208	1.11164	0.222329	0.116428	0.00209571	0.74184	0.0563798	0.1026	0.00389879	184.844	7.32799	172.784	6.81225	9.58816	0.207831	2.47265	0.307911	0.703	0.381375	4.46767	0.93195	4.7939
S2-18	170-180	7.70103	0.051514	50.2966	5.43204	92.832	2.97062	10.0091	0.140127	35.3693	0.212216	6.716	0.902093	0.712335	0.02137	6.69806	0.442072	0.634242	0.0241012	2.77072	0.0775801	0.416848	0.00750326	1.11335	0.0979751	0.122944	0.0137697	0.821032	0.139575	0.106059	0.00148482	208.619	10.4825	195.223	9.6571	10.8154	0.565123	2.58024	0.260308	0.745048	0.405366	4.52236	0.916036	4.93687
S2-19	180-190	6.1092	0.0839503	37.7626	0.830778	68.6744	5.76865	7.46698	0.14934	28.3488	2.77818	5.24953	0.551151	0.575329	0.0425744	5.15784	0.319786	0.508236	0.00609883	2.1252	0.114761	0.333233	0.00866405	0.882283	0.012352	0.111823	0.0458474	0.632918	0.0227851	0.0894584	0.00125242	157.919	10.6522	147.502	10.0781	8.3666	0.48322	2.04972	0.0909009	0.63703	0.371818	4.40454	0.893135	4.93155
S2-20	190-200	4.86449	0.0473752	37.4225	2.46989	69.8431	1.39686	7.33738	0.0880486	27.2447	0.544893	5.19516	0.539794	0.580272	0.0324953	5.14268	0.658262	0.492098	0.00295259	2.06244	0.115497	0.317008	0.0158504	0.876287	0.0385566	0.0953125	0.00667187	0.665928	0.234407	0.0806167	0.00225727	157.355	6.14643	147.043	5.03948	8.27749	0.809207	2.03515	0.297743	0.652076	0.376211	4.14851	0.887701	4.67332
S2-21	200-210	3.66527	0.0494455	48.6126	3.20843	92.7027	0.185405	9.76219	0.0390488	35.4147	0.637465	6.77637	0.918384	0.569368	0.00683241	6.83241	0.286961	0.623166	0.0211876	2.50686	0.0701921	0.37248	0.0141542	0.952682	0.020959	0.0956418	0.0022954	0.582817	0.0862569	0.0769618	0.0078501	205.881	5.50542	193.269	4.98873	10.5318	0.385173	2.08058	0.131516	0.755196	0.321605	6.15746	0.867955	7.09422
S2-22	210-220	3.94288	0.0379445	34.0636	1.09004	67.0241	0.402144	7.13778	0.0713778	25.364	0.963833	4.97382	0.494778	0.478303	0.0325246	4.88499	0.254019	0.457735	0.00823923	1.94909	0.00779638	0.300635	0.0240508	0.801255	0.00961506	0.0905843	0.00507272	0.560572	0.0605418	0.0743929	0.00565386	148.161	3.42968	138.563	3.02217	7.77012	0.30258	1.82744	0.104934	0.645779	0.317599	4.48585	0.850648	5.27345
S2-23	220-230	3.12893	0.0133212	36.1673	3.68907	68.3783	0.41027	7.19532	0	25.4873	0.101949	5.00386	0.500772	0.456263	0.0237257	5.10729	0.0715021	0.47937	0.0115049	1.94829	0.0389658	0.292683	0.0087805	0.768752	0.00922503	0.078489	0.00470934	0.485605	0.00291363	0.0678527	0.00108564	151.917	4.87447	142.232	4.70206	7.99121	0.145698	1.69338	0.0267141	0.647208	0.298909	5.49818	0.86387	6.36459
S2-24	230-240	3.51543	0.0124267	35.9792	0.863501	70.6533	0.141307	7.70264	0.0462158	29.5444	5.19982	5.1447	0.529359	0.493309	0.0138127	4.88563	0.0293138	0.474677	0.0113923	1.9515	0.007806	0.300333	0.0348386	0.787875	0.0283635	0.0780777	0.000312311	0.608208	0.229903	0.0749724	0.000599779	158.679	7.13655	149.024	6.7802	7.80511	0.0623247	1.84947	0.294017	0.658988	0.324989	4.36702	0.898367	4.86106
S2-25	240-250	2.96516	0.00854261	33.3462	1.60062	64.187	0.128374	6.94927	0.0833913	25.5652	0.306782	4.86835	0.474017	0.43297	0.0259782	4.78975	0.459816	0.478709	0.0220206	1.99033	0.171168	0.294419	0.000588839	0.753145	0.0225943	0.0888143	0.0163418	0.512458	0.0215232	0.0692751	0.00180115	144.326	3.33502	134.916	2.59318	7.69176	0.678983	1.71811	0.0628494	0.625874	0.290458	4.80367	0.84929	5.65611
S2-26	250-260	4.42307	0.00701235	47.4224	0.284534	91.0665	0.364266	9.7766	0.273745	34.3838	0.756444	6.82301	0.931068	0.576322	0.00691586	6.61727	0.198518	0.630845	0.00630845	2.62731	0.173403	0.39316	0.00629056	1.05084	0.0441353	0.115435	0.0348613	0.649161	0.0441429	0.0903032	0.0106558	202.223	3.13529	189.472	2.61006	10.4517	0.385145	2.2989	0.140086	0.746515	0.327845	5.39283	0.874233	6.16864
S2-BEDROCK	>260	3.96868	0.0109111	105.448	0	213.01	1.27806	24.147	2.36641	83.752	2.68006	19.167	7.34748	3.024	0.03024	18.947	0.606304	2.034	0.028476	10.224	0.20448	1.767	0.007068	4.935	0.04935	0.612	0.004896	3.874	0.030992	0.543	0.029322	207.352	14.6631	187.962	13.672	14.4409	0.8695	4.9492	0.121628	0.741481	0.663234	2.00939	0.678923	2.95968

## Sheet: Table S4
Table S4. The enrichment factor for the laterite profiles from Yunnan province, southwest China.
Sample	EF (La)	EF (Ce)	EF (Pr)	EF (Nd)	EF (Sm)	EF (Eu)	EF (Gd)	EF (Tb)	EF (Dy)	EF (Ho)	EF (Er)	EF (Tm)	EF (Yb)	EF (Lu)	EF (REEs)
S1-1	1.76286	1.70855	1.66321	1.56442	1.31344	0.90618	1.16243	1.19062	1.19985	1.18786	1.25259	1.335	1.36987	1.33214	18.949
S1-2	1.07644	1.00402	0.990762	1.12174	1.12251	0.886748	1.10785	0.767751	0.818731	0.599833	0.666017	0.758643	0.807873	0.765038	12.494
S1-3	0.99867	0.971905	0.991915	1.10197	1.1464	0.9068	1.14171	0.801757	0.705289	0.615141	0.744182	0.772893	1.01782	0.772817	12.6893
S1-4	1.19622	1.13931	1.14748	1.24447	1.28039	1.02834	1.33427	0.933686	0.772097	0.699614	0.823813	0.844996	0.954012	0.879914	14.2786
S1-5	1.08346	1.06491	1.05352	1.28949	1.37799	1.14339	1.49014	1.04067	0.868082	0.81371	0.909289	0.95572	1.00436	0.9607	15.0554
S1-6	0.921118	0.904461	0.881707	0.933228	1.01244	0.797712	1.01224	0.708715	0.598863	0.542471	0.651128	0.722073	0.722549	0.713846	11.1226
S1-7	1.0306	1.09776	0.955828	0.982779	1.28208	1.06773	1.32533	0.952111	0.780393	0.841003	0.919948	0.924367	1.04826	0.976171	14.1844
S1-8	0.854837	0.813463	0.820609	0.941694	1.02198	0.837705	1.07901	0.784693	0.636502	0.618811	0.694489	0.751325	0.76809	0.725381	11.3486
S1-9	0.901961	0.830609	0.863641	1.03192	1.02744	0.825985	1.0297	0.764211	0.703682	0.580489	0.725253	0.749361	0.814767	0.771269	11.6203
S1-10	0.945511	0.875509	0.958853	1.06599	1.14118	0.92139	1.13833	0.850343	0.730148	0.64706	0.768052	0.810088	0.80921	0.792988	12.4546
S1-11	1.15819	1.01637	1.09302	1.24271	1.26083	0.961253	1.26564	0.916017	0.770688	0.726445	0.811224	0.889875	0.954901	0.906054	13.9732
S1-12	0.869482	0.779642	0.943031	1.00318	1.10547	0.900097	1.1354	0.965109	0.689883	0.622024	0.717073	0.821172	0.82197	0.77704	12.1506
S1-13	1.15756	1.04545	1.21134	1.35388	1.39207	1.31395	1.31707	1.03933	0.832342	0.734784	0.852735	0.908855	0.99243	0.909208	15.061
S1-14	1.02228	0.954625	1.05944	1.09458	1.15974	0.91473	1.2095	0.817619	0.723643	0.633654	0.729565	0.806861	0.877505	0.779649	12.7834
S1-15	1.239	1.10956	1.19663	1.29497	1.26636	0.971569	1.31634	0.872223	0.956202	0.68471	0.774188	0.86347	0.919192	0.87799	14.3424
S1-16	1.06146	0.968074	0.966214	1.12785	1.18692	0.956076	1.26715	0.86269	0.755269	0.662026	0.787178	0.833483	1.20605	0.830277	13.4707
S1-17	1.17779	1.04463	1.05597	1.17196	1.14785	0.912469	1.18728	0.834623	0.74827	0.672879	0.744296	0.902756	0.861893	0.823784	13.2865
S1-18	0.969423	0.90668	0.96919	1.04271	1.0628	0.824144	1.05457	0.770947	0.62264	0.580954	0.724327	0.800139	1.0366	0.764135	12.1293
S1-19	1.15271	1.03142	1.11606	1.11793	1.13202	0.859992	1.1509	0.770162	0.684185	0.68505	0.798847	0.823758	0.87647	0.850745	13.0503
S1-20	1.23146	1.08103	1.07087	1.14266	1.08046	0.848846	1.10877	0.778109	0.662795	0.614919	0.747954	0.784908	0.885502	0.84709	12.8854
S1-21	1.19167	1.11097	1.13207	1.16532	1.12644	0.846114	1.1647	0.775294	0.688151	0.619108	0.708841	0.828014	0.840648	0.801344	12.9987
S1-22	1.13483	1.03828	1.11695	1.10607	1.03676	0.783833	1.02672	0.6625	0.596186	0.54483	0.67179	0.706373	0.803702	0.749417	11.9782
S1-23	1.08541	1.0082	1.00288	1.12333	1.03681	0.808323	1.03074	0.72482	0.611402	0.552463	0.658894	0.763706	0.799218	0.741912	11.9481
S1-24	1.23736	1.14368	1.10124	1.28528	1.21494	0.930015	1.22908	0.82561	0.705243	0.624989	0.738173	0.812518	0.863134	0.839062	13.5503
Sample	EF (La)	EF (Ce)	EF (Pr)	EF (Nd)	EF (Sm)	EF (Eu)	EF (Gd)	EF (Tb)	EF (Dy)	EF (Ho)	EF (Er)	EF (Tm)	EF (Yb)	EF (Lu)	EF (REEs)
S2-1	2.48543	2.04097	1.98563	1.73606	1.69315	0.807542	1.73903	1.00736	0.726072	0.525481	0.521218	0.485113	0.631309	0.354552	16.7389
S2-2	2.78596	2.33988	2.29218	1.95788	1.8914	0.874278	1.98701	1.16298	0.878721	0.606997	0.615262	0.527917	0.547108	0.446841	18.9144
S2-3	2.60196	2.30965	2.14531	1.93713	1.84858	0.825124	1.85685	1.07759	0.756689	0.575278	0.55374	0.473557	0.476777	0.412651	17.8509
S2-4	3.08361	2.61525	2.41847	2.14822	2.09055	0.955759	2.15593	1.19729	0.840099	0.628346	0.627478	0.54722	0.520147	0.438056	20.2664
S2-5	4.01129	3.44573	3.25481	2.91463	2.89024	1.01022	2.88523	1.63718	1.08447	0.813114	0.77163	0.600966	0.567036	0.447993	26.3345
S2-6	2.81482	2.45782	2.2678	1.99668	1.95821	0.77603	2.01893	1.14941	0.826801	0.574729	0.651813	0.532183	0.659733	0.446784	19.1317
S2-7	2.2587	1.98528	1.94161	1.79413	1.5624	0.671183	1.60513	0.888307	0.621377	0.460321	0.528608	0.427588	0.438603	0.34307	15.5263
S2-8	2.3735	2.01549	1.82874	1.60252	1.59193	0.726855	1.57936	0.962635	0.682273	0.540405	0.506406	0.477369	0.498349	0.419527	15.8053
S2-9	1.46377	1.27523	1.15629	1.06297	0.977166	0.460471	1.05017	0.598459	0.445224	0.34457	0.3442	0.334844	0.306515	0.268431	10.0883
S2-10	1.52874	1.27905	1.15215	1.04095	0.991944	0.482528	1.01479	0.647121	0.449881	0.360047	0.388138	0.370036	0.340776	0.278179	10.3243
S2-11	1.43391	1.22659	1.12518	1.0387	0.942676	0.488519	1.00606	0.584778	0.449584	0.357237	0.348758	0.328481	0.362386	0.29097	9.98383
S2-12	1.4823	1.25452	1.22414	1.04484	0.994918	0.491112	0.995862	0.597096	0.428974	0.319058	0.35325	0.319483	0.325438	0.289457	10.1204
S2-13	1.50019	1.32066	1.21455	1.06393	1.02775	0.489687	1.11443	0.646895	0.451556	0.342479	0.362583	0.316806	0.335894	0.284982	10.4724
S2-14	1.62839	1.38121	1.25122	1.09421	1.06767	0.487187	1.15754	0.645583	0.461803	0.376137	0.379975	0.3462	0.336393	0.29685	10.9104
S2-15	1.56023	1.29423	1.24388	1.1272	1.05586	0.515736	1.10803	0.656468	0.505234	0.358018	0.420526	0.351294	0.362388	0.280419	10.8395
S2-16	1.83556	1.58156	1.45507	1.38652	1.23768	0.571107	1.26444	0.737408	0.553554	0.460382	0.426718	0.368597	0.347409	0.338041	12.564
S2-17	2.11304	1.80188	1.67653	1.44852	1.46558	0.540914	1.49509	0.898596	0.655401	0.489162	0.498287	0.391411	0.367527	0.321927	14.1639
S2-18	2.26257	1.94232	1.83777	1.59107	1.54931	0.582618	1.62869	0.951034	0.69244	0.487056	0.476986	0.39504	0.388775	0.318066	15.1037
S2-19	2.2588	1.91061	1.82303	1.69571	1.61028	0.625705	1.66768	1.01335	0.706224	0.517729	0.502614	0.47777	0.398511	0.356735	15.5648
S2-20	2.24486	1.94868	1.79652	1.63432	1.59816	0.632886	1.66753	0.983981	0.687331	0.493931	0.500626	0.408393	0.420494	0.322396	15.3401
S2-21	4.18967	3.71609	3.4341	3.05222	2.99498	0.892199	3.18298	1.79025	1.2003	0.833823	0.781971	0.588778	0.528738	0.442197	27.6283
S2-22	2.55082	2.33443	2.18165	1.89936	1.91005	0.651221	1.97734	1.14257	0.810865	0.584746	0.571439	0.484522	0.441872	0.371389	17.9123
S2-23	3.14632	2.76673	2.55488	2.21723	2.23233	0.721673	2.40163	1.39007	0.941603	0.66134	0.636919	0.487717	0.444679	0.393517	20.9966
S2-24	2.85143	2.60439	2.49164	2.34147	2.09092	0.710835	2.09296	1.25398	0.859227	0.618236	0.594676	0.441989	0.507388	0.396116	19.8552
S2-25	3.16314	2.83192	2.69058	2.42505	2.36821	0.746736	2.45592	1.51364	1.04888	0.725401	0.680396	0.601766	0.511691	0.438085	22.2014
S2-26	3.33503	2.97876	2.80632	2.41807	2.46069	0.736916	2.51549	1.47883	1.02649	0.718165	0.703822	0.579862	0.480556	0.423377	22.6624
